# Supplementary material for: Fatty acids and lipid levels in Atlantic salmon (Salmo salar) change with sea-age and differ from other pelagic fish in the Norwegian sea
Source: Research Square preprint supplement (doi:10.21203/rs.3.rs-7827046/v1), 2025-11-10
Supplement: Supplementary file 1 [file ccb51634d85de8ade1504570.docx]

# Supporting information

Table S1. Numbers (for fish – individuals, for zooplankton and herring larvae – samples of 5-10 individuals), average size and date of biological sampling.

|  | **Post-smolts** | | | | | | **Adult salmon** | | | |
| --- | --- | --- | --- | --- | --- | --- | --- | --- | --- | --- |
| Year | N | Date (range) | Date (average) | Latitude (average) | Length (cm) ± SD | Weight (g) ± SD | N | Dates | Length (cm) ± SD | Weight (g) ± SD |
| 2012 | 5 | (7.June - 14.July) | 2. July | 66˚50' | 23.5 ± 1.7 | 122 ± 25 | - | - | - | - |
| 2013 | 14 | (10.July -24.July) | 16. July | 68˚05' | 23.5 ± 2.3 | 114 ± 30 | 14 | 5.May -25.July | 52.6 ± 6.2 | 1249 ± 749 |
| 2014 | 13 | (6.July - 22.July) | 16. July | 70˚11' | 26.1 ± 2.1 | 148 ± 35 | 11 | 7.July - 24.July | 56.3 ± 6.6 | 1635 ± 825 |
| 2015 | 39 | (5.July - 26.July) | 11. July | 67˚51' | 23 ± 2.6 | 107 ± 36 | 12 | 20.May - 23.July | 56.1 ± 8.3 | 1740 ± 1305 |
| 2016 | 49 | (6.July - 27.July) | 19. July | 70˚30' | 24.4 ± 2.7 | 123 ± 34 | 10 | 5.July - 22.July | 51.2 ± 3.8 | 1150 ± 2971 |
| 2017 | 27 | (11.July - 3.Aug) | 28. July | 71˚51' | 26.5 ± 1.8 | 170 ± 42 | 7 | 21.May - 23.July | 54.7 ± 3.8 | 1504 ± 3707 |
| 2018 | 60 | (7.July - 3.Aug) | 19. July | 69˚26' | 24.6 ± 2.8 | 129 ± 46 | 12 | 14.May - 3.Aug | 60.2 ± 9.1 | 2314 ± 1201 |
| 2019 | 50 | (8.July - 21.Aug) | 20. July | 69˚15' | 25.1 ± 3.5 | 143 ± 66 | 6 | 7.July - 1.Aug | 53.7 ± 5.4 | 1429 ± 566 |
| 2020 | 37 | (9.July - 29.July) | 24. July | 71˚36' | 25.5 ± 2.3 | 154 ± 39 | 17 | 7.May - 1.Aug | 54.4 ± 5.7 | 1574 ± 627 |
|  |  |  |  |  |  |  |  |  |  |  |
|  |  | **Herring** | | | | |  | **Mackerel** | | |
|  | N | Dates (range) | - | - | Length (cm) ± SD | Weight (g) ± SD | N | Dates (range) | Length (cm) ± SD | Weight (g) ± SD |
| 2015 | 7 | 3.July | - | - | 36.6 ± 1.1 | 420 ± 34 | 17 | 4.July - 11July | 34.3 ± 2.7 | 354 ± 90 |
| 2016 | 10 | 6.July | - | - | 30.2 ± 1.7 | 244 ± 44 | - | - |  |  |
| 2017 | 37 | 6.July - 14July | - | - | 29.6 ± 2.9 | 255 ± 83 | 39 | 6.July - 18July | 32.6 ± 4.8 | 330 ± 123 |
|  |  |  |  |  |  |  |  |  |  |  |
|  | **Amphipoda spp** | | **Herring larvae** | | **Euphausiidea spp** | | ***C. finmarchicus*** | | ***C. hyperboreus*** | |
| Year | N | Date (range) | N | Date (range) | N | Date (range) | N | Date (range) | N | Date (range) |
| 2015 | 6 | 17.July - 19.July | 15 | 8.Apr -18.Apr | 3 | 17.July - 23.July | 9 | 3.May - 17.July | 5 | 11.May - 19.July |
| 2016 | 5 | 9.Apr - 19.Apr | 24 | 3.Apr -14.Apr | 25 | 9.Apr - 22.Apr | 6 | 4.May - 22.May | 9 | 10.May - 22.May |
| 2017 | 34 | 11.June - 18.July | - | - | 34 | 1.June - 17.July | 24 | 10.Jun - 20.July | 2 | 1.Jun -3.June |


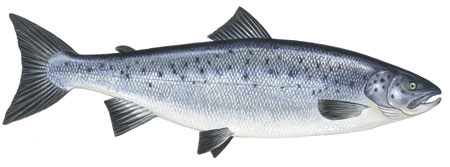


**Standardization of sampling**


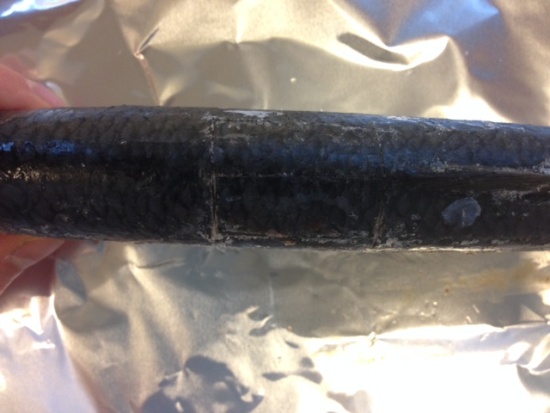

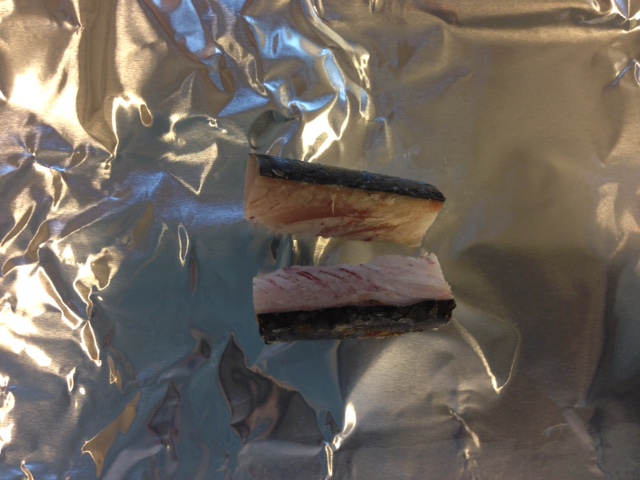


Figur S1: The sampling was standardized to be performed in front of the dorsal fin, where a 1cm deep and 1-2 cm long muscle sample was collected.

Table S2: Model parameters for linear regression of lipid content in standardized muscle samples and whole fish:


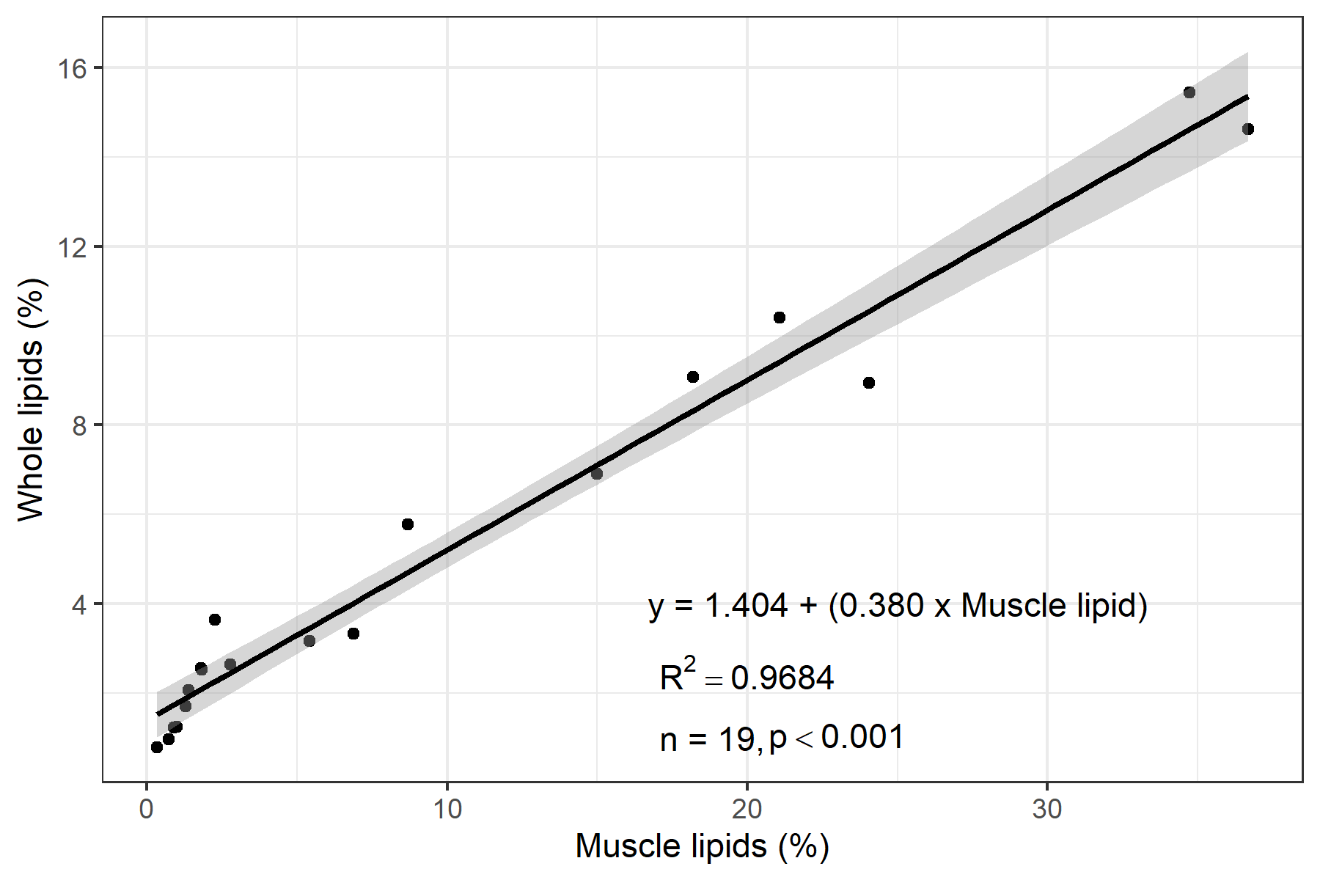


Fig S2. Linear regression (black line) of lipid content in standardized muscle samples and whole salmon and the associated confidence interval (gray shaded area). Whole fish lipid (%) = 1.404+0.380*Muscle lipid (%).

Fig: S3: Chromatogram of HPLC lipid classes separation of muscle lipids from a very lean post-smolt (1:3 % total lipids) and a fat adult salmon (37 % total lipids):

**S2. Comparison of FAs and lipids in standard muscle sample and whole fish.**

Table S3: Comparison of whole fish and standard muscle analysis: Fatty acid profile in triacylglycerol (TAG) and total lipid (TL) from smolt and adult salmon- The two tissue are compared using t-test, FAs that are significant different (P<0:05) are marked with green.

Table S3 continue

Table S4: Lipid classes distribution of a post-smolt and an adult salmon. These two individuals are considered representative for an average post-smolt and an average adult salmon in the dataset.

**S3 Escape farmed fish**

Four adult salmon (one ind. sampled in 2014, one ind. sampled in 2015 and two ind. sampled in 2016) were identified as escaped farmed fish. In these individuals, 48-60 % of the total FAs where terrestrial FATM (18:1n-9+18:2n-6+18:3n-3), which is much higher than in wild salmon where the three terrestrial FATM in total contribute with <20 % of the total FAs (Skilbrei et al., 2015). The farmed fish also differed from the wild fish by having high lipid concentration and high condition factor than in the wild fish. The fish are included in tables S5 and S7 in supplementary but are excluded from any further analyses.

**S4 Statistical modelling**

Table S5. The initial and final GAMMs applied to test if observed variation in total lipids levels in post-smolts and salmon, PC1 from PCA including post-smolts only, or FA biomarkers in post-smolts were linked to individual size or geographic position. Year is always included as a random variable, α is the model intercept and ԑ is the error term for the residuals following a gaussian distribution centered around 0. Some data points were identified as outliers and removed from the GAM. This includes: one adult salmon with low weight (636 g) and condition factor (0.77) sampled in July 2014, one post-smolt with 5.15% lipids, which was 1.26% higher than the second highest post-smolt lipid concentration. CF – Fulton’s condition factor.

| **Model** | **ΔAIC** | **Dev, Expl.** | **GCV score** | **AIC** |
| --- | --- | --- | --- | --- |
|  |  |  |  |  |
| Lipid levels - Post-smolts, gamma distribution with log-link (n=280) |  |  |  |  |
| ***Lipid ~ s(lat,lon) + s(Weight) + s(CF) + year + Ɛ*** | **0** | **34.6%** | **0.028774** | **177,5756** |
|  |  |  |  |  |
| Lipid levels - Seawinter, gamma distribution with log-link (n=86) |  |  |  |  |
| *Lipid ~ α + s(lat,lon) +s(CF) + s(Length) + Month + Year + Ɛ* | 2,767 | 49.5% | 0.25225 | 429,6555 |
| ***Lipid ~ α +s(CF) + Year + Ɛ*** | **0** | **48.3%** | **0.2435** | **426,8884** |
|  |  |  |  |  |
| PC1 - Post-smolts, gaussian distribution with identity link (n=280) |  |  |  |  |
| *PC1 ~ α + s(lat,lon) + β1*CF + β2*Length + β3*Lipid+ s(year) + Ɛ* | -0,991 | 51.2% | 10.59 | 1455,802 |
| ***PC1 ~ α + s(lat,lon) + β3*Lipid+ s(year) + Ɛ*** | **0** | **50.5%** | **10.618** | **1456,793** |
|  |  |  |  |  |
| FATM Calanus - Post-smolts, gaussian distribution with identity link (n=280) |  |  |  |  |
| ***FATM Calanus ~ α + s(lat,lon) + s(year) + Ɛ*** | - | 42.7% | 32.736 | 1771.705 |
|  |  |  |  |  |
| FATM age-0 fish - Post-smolts, gaussian distribution with identity link (n=280) |  |  |  |  |
| ***FATM age-0 fish ~ α + s(lat,lon) + s(year) + Ɛ*** | - | 31.1% | 32.476 | 1769.703 |


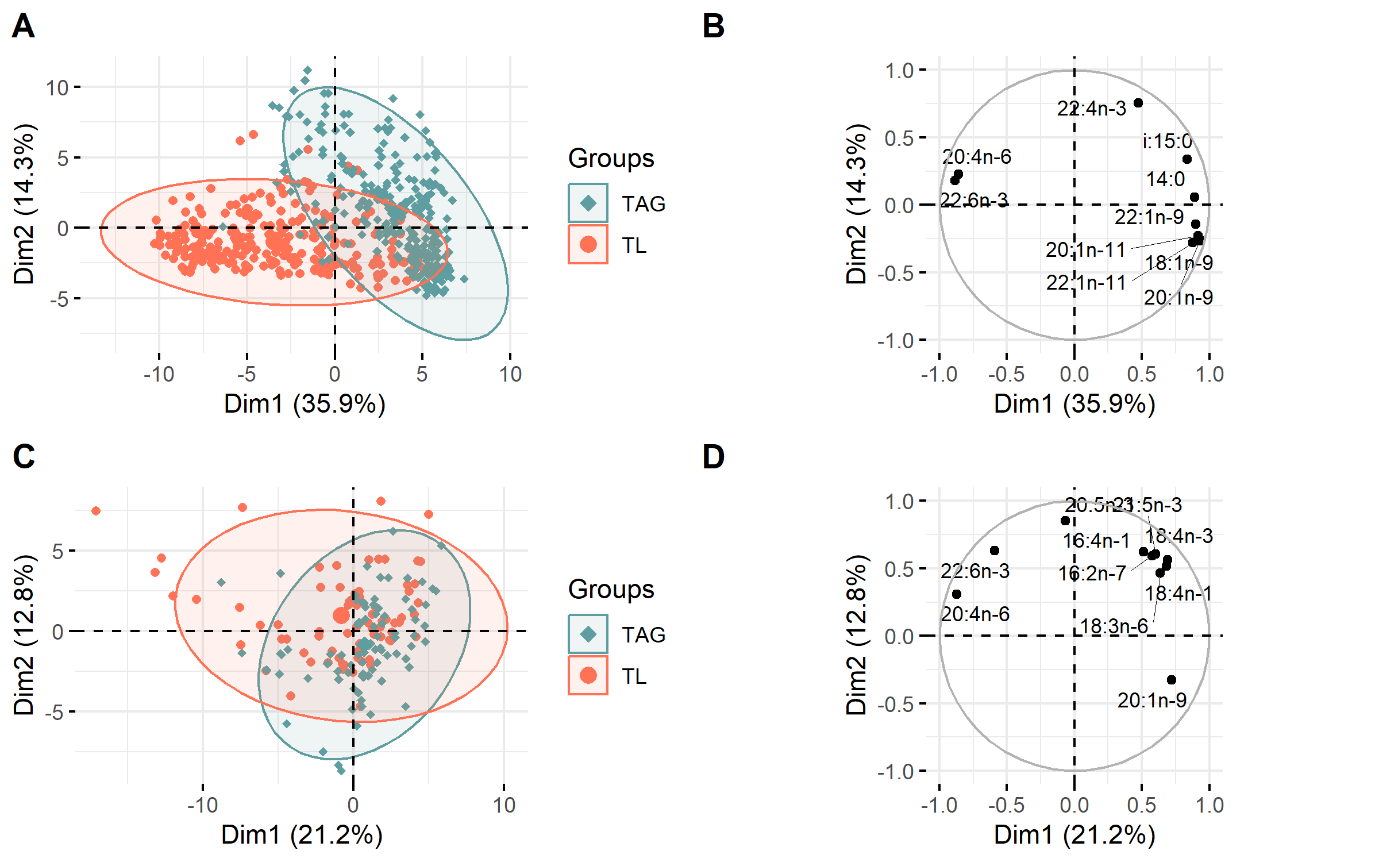


Fig. S4. A) Principal coordinate analysis (PCoA) of corresponding samples of triacylglycerol (TAG) and total lipid (TL) of post smolt muscle (all years are analyzed together), B) corresponding loading plot for the PCoA for post-smolts presented in panel A), C) PCoA of corresponding samples of triacylglycerol (TAG) and total lipid (TL) of adult salmon muscle (all years are analyzed together), D corresponding loading plot for the PCoA for adult salmon presented in panel C).


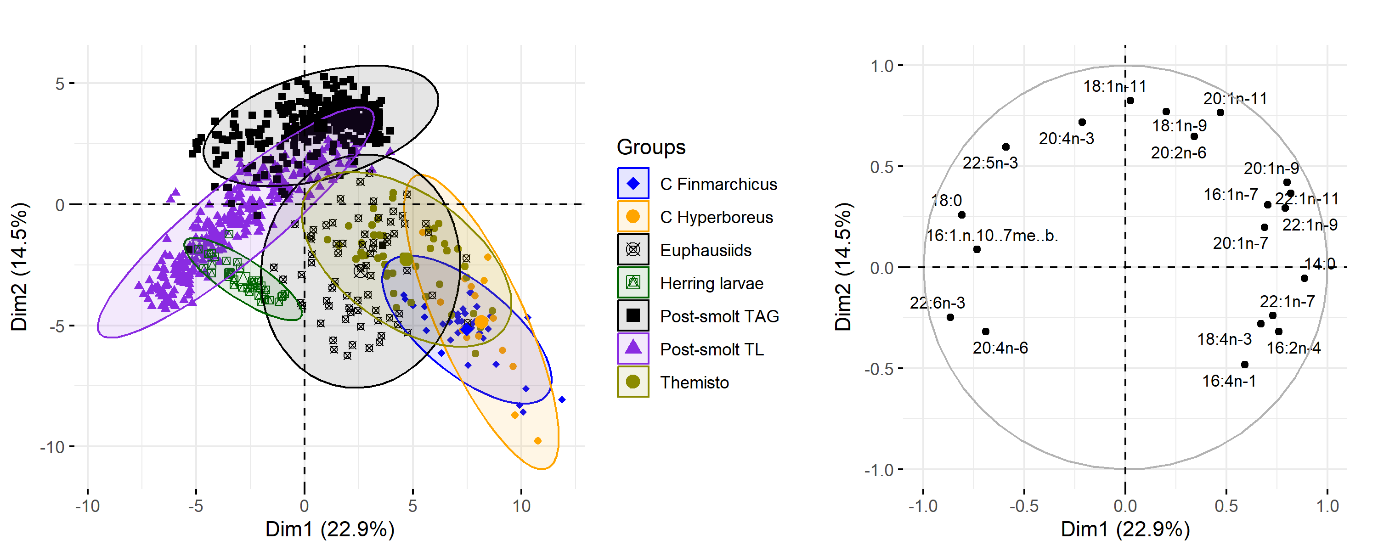


Fig. S5. PCoA of the fatty acid composition in post-smolt TL and TAG and prey species.

**S5. Fatty acids profiles of all the different samples.**

Table S6: Fish data and FAs profiles (% of total FAs) in the storage lipids (TAG) in muscle of post-smolt of Atlantic salmon. Data are presented as average ± SD.

Table S6: Continue

Table S6: Continue

Table S7: Fish data and FAs profiles (% of total FAs) in the storage lipids (TAG) in muscle of adult salmon- Data are presented as average ± SD.

Table S7: Continue

Table S7: Continue

Table S8: FAs profiles (% of total FAs) in the total lipid (TL) in muscle of post-smolts. Data are presented as average ± SD.

Table S8: Continue

Table S8: Continue

Table S9: FAs profiles (% of total FAs) in the total lipids (TL) in muscle of adult salmon. Data are presented as average ± SD.

Table S9: Continue

Table S9: Continue

Table S10: A: FAs profiles (% of total FAs) and FAOHs profiles (% of total FAOHs) in *Calanus finmarchicus* caught in the Norwegian Sea in spring/summer of 2015-2017: B: FAs profiles of the combined FA and FAOH data (% of FAS+FAOHs: Data are presented as average ± SD.

Table S10 continues:

Table S10 continues:

Table S10 continues:

Table S11: A: FAs profiles (% of total FAs), FAOHs profiles (% of total FAOHs) and stable isotopes (δ13C and δ15N) in *Calanus hyperboreus* caught in the Norwegian Sea in spring/summer of 2015-2017: B: FAs profiles of the combined FA and FAOH data (% of FAS+FAOHs: Data are presented as average ± SD.

Table S11 continues:

Table S11 continues:

Table S11 continues:

Table S12: A: FAs profiles (% of total FAs) and FAOHs profiles (% of total FAOHs) in *Themisto abyssorum* caught in the Norwegian Sea in spring/summer of 2015-2017: B: FAs profiles of the combined FA and FAOH data (% of FAS+FAOHs: Data are presented as average ± SD.

Table S12 continues:

Table S12 continues:

Table S12 continues:

Table S13: A: FAs profiles (% of total FAs) and FAOHs profiles (% of total FAOHs) in *Themisto libellula* caught in the Norwegian Sea in spring/summer of 2015-2017: B: FAs profiles of the combined FA and FAOH data (% of FAS+FAOHs: Data are presented as average ± SD.

Table S13 continues:

Table S13 continues:

Table S13 continues:

Table S14: A: FAs profiles (% of total FAs) in *Meganyctiphanes norvegica* caught in the Norwegian Sea in spring/summer of 2015-2017: Data are presented as average ± SD.

Table S14 continues:

Table S14 continues:

Table S15: A: FAs profiles (% of total FAs) and FAOHs profiles (% of total FAOHs) in *Thysanoessa inermis* caught in the Norwegian Sea in spring/summer of 2015-2017: B: FAs profiles of the combined FA and FAOH data (% of FAS+FAOHs). Data are presented as average ± SD.

Table S15 continues:

Table S15 continues:

Table S15 continues:

Table S16: A: FAs profiles (% of total FAs) and FAOHs profiles (% of total FAOHs) in *Thysanoessa longicaudata* caught in the Norwegian Sea in spring/summer of 2015-2017: B: FAs profiles of the combined FA and FAOH data (% of FAS+FAOHs). Data are presented as average ± SD.

Table S16 continues:

Table S16 continues:

Table S16 continues:

Table S17: FAs profiles (% of total FAs) in total lipid of larvae of Atlantic herring (*Clupea harengus*)caught in at the Norwegian coast in March of 2015 and 2017: Data are presented as average ± SD.

Table S17 continues:

Table S17 continues:

Table S18: Fish data and FAs profiles (% of total FAs) in the storage lipids (TAG) in muscle of adult Atlantic herring (*Clupea harengus*) caught at different stations in the Norwegian Sea or along the Norwegian coast in Juli of 2015, 2016 and 2017: Data are presented as average ± SD.

Table S18 continues:

Table S18 continues:

Table S19: Fish data and FAs profiles (% of total FAs) in the storage lipids (TAG) in muscle of adult Atlantic Mackerel (*Scomber scombrus*)caught in at different stations in the Norwegian Sea in Juli of 2015 and 2017: Data are presented as average ± SD.

Table S19 continues:

Table S19 continues:

**S6 Output from SIMPER analyses**

Table S20. Output of SIMPER analyses for each fatty acid (log 10 transformed values); Seawinter salmon (TAG) and post-smolts (TAG)

|  | average | sd | ratio | ava | avb | cumsum | p |
| --- | --- | --- | --- | --- | --- | --- | --- |
| 22:6n-3 | 0,0081 | 0,0056 | 1,4396 | 1,1468 | 0,9744 | 0,0646 | 0,1748 |
| 22:1n-11 | 0,0078 | 0,0067 | 1,1581 | 0,9019 | 1,0730 | 0,1270 | 1,0000 |
| 20:1n-9 | 0,0072 | 0,0063 | 1,1424 | 0,8907 | 1,0545 | 0,1848 | 1,0000 |
| 20:5n-3 | 0,0052 | 0,0041 | 1,2722 | 0,8500 | 0,8161 | 0,2267 | 1,0000 |
| 18:00 | 0,0050 | 0,0042 | 1,1966 | 0,6264 | 0,5352 | 0,2669 | 1,0000 |
| 18:1n-9 | 0,0049 | 0,0036 | 1,3781 | 1,1758 | 1,1978 | 0,3066 | 1,0000 |
| 16:1n-7 | 0,0049 | 0,0035 | 1,3804 | 0,6664 | 0,7654 | 0,3456 | 0,0030 |
| 18:4n-3 | 0,0042 | 0,0032 | 1,3266 | 0,3612 | 0,3403 | 0,3792 | 1,0000 |
| 24:1n-9 | 0,0041 | 0,0043 | 0,9444 | 0,3751 | 0,3005 | 0,4118 | 0,9481 |
| 22:5n-3 | 0,0039 | 0,0028 | 1,3959 | 0,5322 | 0,4955 | 0,4428 | 1,0000 |
| 20:1n-11 | 0,0038 | 0,0031 | 1,2170 | 0,3617 | 0,3971 | 0,4731 | 1,0000 |
| 22:1n-9 | 0,0036 | 0,0030 | 1,2144 | 0,3356 | 0,4062 | 0,5024 | 1,0000 |
| 16:00 | 0,0036 | 0,0031 | 1,1510 | 1,1619 | 1,1503 | 0,5313 | 0,9880 |
| 18:1n-7 | 0,0033 | 0,0026 | 1,2655 | 0,5312 | 0,6075 | 0,5579 | 1,0000 |
| 14:00 | 0,0033 | 0,0026 | 1,2367 | 0,6419 | 0,7039 | 0,5840 | 1,0000 |
| 20:4n-3 | 0,0029 | 0,0022 | 1,3020 | 0,4113 | 0,3722 | 0,6070 | 1,0000 |
| 18:1n-11 | 0,0027 | 0,0021 | 1,2965 | 0,2717 | 0,2852 | 0,6285 | 1,0000 |
| 17:00 | 0,0026 | 0,0020 | 1,2731 | 0,1606 | 0,0877 | 0,6491 | 0,0010 |
| 20:4n-6 | 0,0025 | 0,0021 | 1,1903 | 0,1710 | 0,1249 | 0,6690 | 1,0000 |
| 18:3n-3 | 0,0023 | 0,0019 | 1,2513 | 0,2808 | 0,2435 | 0,6878 | 1,0000 |
| 18:2n-6 | 0,0023 | 0,0022 | 1,0312 | 0,3907 | 0,3594 | 0,7064 | 0,9860 |
| 24:5n-3 | 0,0021 | 0,0016 | 1,3164 | 0,2061 | 0,1542 | 0,7234 | 0,9910 |
| 22:4n-6 | 0,0017 | 0,0020 | 0,8632 | 0,0775 | 0,0409 | 0,7374 | 0,1958 |
| 20:1n-7 | 0,0016 | 0,0012 | 1,3157 | 0,1344 | 0,1613 | 0,7498 | 1,0000 |
| 22:5n-6 | 0,0015 | 0,0014 | 1,0853 | 0,1009 | 0,0603 | 0,7619 | 0,3746 |
| 18:1n-5 | 0,0014 | 0,0011 | 1,2874 | 0,1795 | 0,1955 | 0,7734 | 0,9990 |
| 16:2n-4 | 0,0014 | 0,0010 | 1,3641 | 0,0531 | 0,0906 | 0,7843 | 1,0000 |
| 24:6n-3 | 0,0013 | 0,0012 | 1,0898 | 0,0770 | 0,0428 | 0,7949 | 0,1329 |
| 15:00 | 0,0013 | 0,0012 | 1,1236 | 0,1593 | 0,1302 | 0,8053 | 1,0000 |
| 17:1n-8 | 0,0013 | 0,0009 | 1,4098 | 0,1410 | 0,1133 | 0,8156 | 0,9401 |
| 21:5n-3 | 0,0012 | 0,0009 | 1,3051 | 0,1070 | 0,1137 | 0,8253 | 1,0000 |
| 18:4n-1 | 0,0011 | 0,0009 | 1,2275 | 0,0515 | 0,0780 | 0,8341 | 0,0010 |
| Phytanic_acid | 0,0010 | 0,0015 | 0,7000 | 0,0369 | 0,0490 | 0,8423 | 0,9980 |
| 16:4n-1 | 0,0010 | 0,0010 | 1,0206 | 0,0212 | 0,0458 | 0,8500 | 1,0000 |
| i:17:0 | 0,0010 | 0,0008 | 1,2431 | 0,1000 | 0,0781 | 0,8578 | 1,0000 |
| 16:1n-9 | 0,0010 | 0,0010 | 0,9130 | 0,1018 | 0,0812 | 0,8654 | 0,9980 |
| 24:1n-7 | 0,0009 | 0,0007 | 1,2362 | 0,0799 | 0,0794 | 0,8725 | 1,0000 |
| 22:00 | 0,0009 | 0,0011 | 0,7918 | 0,0429 | 0,0223 | 0,8794 | 0,1209 |
| 16:1.n.10..7me..a. | 0,0008 | 0,0007 | 1,2625 | 0,0586 | 0,0451 | 0,8861 | 1,0000 |
| 20:3:n-3 | 0,0008 | 0,0007 | 1,1797 | 0,0985 | 0,0839 | 0,8929 | 1,0000 |
| 20:00 | 0,0008 | 0,0010 | 0,8184 | 0,0666 | 0,0507 | 0,8996 | 1,0000 |
| 16:1n-5 | 0,0008 | 0,0005 | 1,4952 | 0,0745 | 0,0907 | 0,9062 | 1,0000 |
| 20:2n-6 | 0,0008 | 0,0006 | 1,2690 | 0,1394 | 0,1375 | 0,9128 | 1,0000 |
| 16:1.n.10..7me..b. | 0,0008 | 0,0007 | 1,1574 | 0,0752 | 0,0609 | 0,9194 | 1,0000 |
| 22:1n-7 | 0,0008 | 0,0006 | 1,2647 | 0,0651 | 0,0732 | 0,9258 | 1,0000 |
| 22:4n-3 | 0,0007 | 0,0005 | 1,2367 | 0,0575 | 0,0455 | 0,9311 | 1,0000 |
| Pristanic_acid | 0,0007 | 0,0006 | 1,1339 | 0,0109 | 0,0271 | 0,9364 | 0,4965 |
| i:18:0 | 0,0006 | 0,0005 | 1,2675 | 0,0668 | 0,0589 | 0,9414 | 1,0000 |
| i:15:0 | 0,0006 | 0,0005 | 1,2145 | 0,0760 | 0,0734 | 0,9464 | 1,0000 |
| 4,8,12,Me,13,0 | 0,0006 | 0,0006 | 1,0312 | 0,0314 | 0,0375 | 0,9512 | 1,0000 |
| 18:3n-4 | 0,0005 | 0,0004 | 1,3686 | 0,0334 | 0,0285 | 0,9552 | 1,0000 |
| 16:3n-4 | 0,0005 | 0,0004 | 1,0833 | 0,0080 | 0,0204 | 0,9591 | 1,0000 |
| 18:2n-4 | 0,0005 | 0,0004 | 1,1987 | 0,0682 | 0,0681 | 0,9629 | 1,0000 |
| 20:3n-6 | 0,0005 | 0,0004 | 1,2636 | 0,0536 | 0,0467 | 0,9667 | 1,0000 |
| 24:00:00 | 0,0005 | 0,0005 | 0,8942 | 0,0218 | 0,0108 | 0,9705 | 1,0000 |
| 14:1n-5 | 0,0004 | 0,0003 | 1,4136 | 0,0163 | 0,0272 | 0,9739 | 1,0000 |
| ai:17:0 | 0,0004 | 0,0003 | 1,1884 | 0,0395 | 0,0321 | 0,9771 | 1,0000 |
| 17:1n-7 | 0,0004 | 0,0008 | 0,4791 | 0,0173 | 0,0077 | 0,9803 | 0,2358 |
| 16:4n-3 | 0,0004 | 0,0004 | 0,9468 | 0,0178 | 0,0150 | 0,9834 | 1,0000 |
| 16:1n-11 | 0,0004 | 0,0006 | 0,6090 | 0,0337 | 0,0308 | 0,9864 | 1,0000 |
| 18:3n-6 | 0,0004 | 0,0003 | 1,1285 | 0,0296 | 0,0250 | 0,9895 | 1,0000 |
| 18:2n-7 | 0,0004 | 0,0003 | 1,1892 | 0,0446 | 0,0386 | 0,9924 | 1,0000 |
| ai:15:0 | 0,0003 | 0,0002 | 1,2021 | 0,0253 | 0,0247 | 0,9946 | 1,0000 |
| i:16:0 | 0,0002 | 0,0002 | 1,1714 | 0,0284 | 0,0264 | 0,9964 | 1,0000 |
| 16:2n-7 | 0,0002 | 0,0003 | 0,5804 | 0,0073 | 0,0095 | 0,9978 | 1,0000 |
| 17:1n-10 | 0,0001 | 0,0001 | 1,0983 | 0,0141 | 0,0113 | 0,9989 | 1,0000 |
| 16:2n-6 | 0,0001 | 0,0002 | 0,8576 | 0,0107 | 0,0110 | 1,0000 | 1,0000 |

Table S21. Output of SIMPER analyses for each fatty acid (log 10 transformed values); Post-smolts (TAG) and mackerel

| FA | average | sd | ratio | ava | avb | cumsum | p |
| --- | --- | --- | --- | --- | --- | --- | --- |
| 18:4n-3 | 0,0131 | 0,0046 | 2,8321 | 0,3612 | 0,7584 | 0,0836 | 0,0099 |
| 22:1n-11 | 0,0094 | 0,0072 | 1,3076 | 0,9019 | 1,1644 | 0,1438 | 1,0000 |
| 14:00 | 0,0079 | 0,0036 | 2,2223 | 0,6419 | 0,8836 | 0,1947 | 0,0099 |
| 18:1n-9 | 0,0078 | 0,0051 | 1,5314 | 1,1758 | 0,9685 | 0,2444 | 0,8119 |
| 22:5n-3 | 0,0066 | 0,0036 | 1,8432 | 0,5322 | 0,3379 | 0,2865 | 0,6139 |
| 22:6n-3 | 0,0060 | 0,0039 | 1,5676 | 1,1468 | 1,0738 | 0,3252 | 1,0000 |
| 20:1n-9 | 0,0057 | 0,0052 | 1,0941 | 0,8907 | 0,9584 | 0,3615 | 1,0000 |
| 18:00 | 0,0052 | 0,0044 | 1,1739 | 0,6264 | 0,5055 | 0,3946 | 1,0000 |
| 18:1n-11 | 0,0050 | 0,0026 | 1,9027 | 0,2717 | 0,1236 | 0,4263 | 0,0099 |
| 20:5n-3 | 0,0046 | 0,0037 | 1,2440 | 0,8500 | 0,9197 | 0,4558 | 1,0000 |
| 20:1n-11 | 0,0046 | 0,0026 | 1,7389 | 0,3617 | 0,2582 | 0,4851 | 1,0000 |
| 16:4n-1 | 0,0044 | 0,0022 | 2,0367 | 0,0212 | 0,1563 | 0,5134 | 0,0099 |
| 18:3n-3 | 0,0040 | 0,0023 | 1,7760 | 0,2808 | 0,3927 | 0,5391 | 0,2673 |
| 24:1n-9 | 0,0038 | 0,0040 | 0,9593 | 0,3751 | 0,2816 | 0,5638 | 0,9802 |
| 18:1n-7 | 0,0038 | 0,0026 | 1,4574 | 0,5312 | 0,4330 | 0,5882 | 1,0000 |
| 20:4n-3 | 0,0038 | 0,0024 | 1,6164 | 0,4113 | 0,3122 | 0,6127 | 1,0000 |
| 16:1n-7 | 0,0036 | 0,0026 | 1,3947 | 0,6664 | 0,6656 | 0,6356 | 1,0000 |
| 22:1n-9 | 0,0031 | 0,0024 | 1,2924 | 0,3356 | 0,3277 | 0,6557 | 1,0000 |
| 16:00 | 0,0029 | 0,0024 | 1,2114 | 1,1619 | 1,1641 | 0,6743 | 1,0000 |
| 16:2n-4 | 0,0023 | 0,0012 | 1,9440 | 0,0531 | 0,1227 | 0,6890 | 0,0099 |
| 21:5n-3 | 0,0022 | 0,0012 | 1,7730 | 0,1070 | 0,1712 | 0,7029 | 0,0099 |
| 20:4n-6 | 0,0021 | 0,0016 | 1,3102 | 0,1710 | 0,1593 | 0,7162 | 1,0000 |
| 4,8,12,Me,13,0 | 0,0021 | 0,0011 | 1,8365 | 0,0314 | 0,0932 | 0,7294 | 0,0099 |
| 20:1n-7 | 0,0020 | 0,0014 | 1,4302 | 0,1344 | 0,1007 | 0,7423 | 0,9901 |
| 18:2n-6 | 0,0020 | 0,0020 | 0,9950 | 0,3907 | 0,3948 | 0,7552 | 1,0000 |
| 24:5n-3 | 0,0020 | 0,0017 | 1,1686 | 0,2061 | 0,1777 | 0,7679 | 1,0000 |
| 22:4n-6 | 0,0019 | 0,0021 | 0,8952 | 0,0775 | 0,0233 | 0,7801 | 0,0693 |
| 16:3n-4 | 0,0019 | 0,0010 | 1,9372 | 0,0080 | 0,0648 | 0,7920 | 0,0099 |
| 17:00 | 0,0018 | 0,0015 | 1,1987 | 0,1606 | 0,1330 | 0,8037 | 1,0000 |
| 18:1n-5 | 0,0017 | 0,0010 | 1,7213 | 0,1795 | 0,1343 | 0,8144 | 0,3069 |
| 22:5n-6 | 0,0014 | 0,0011 | 1,3239 | 0,1009 | 0,1149 | 0,8235 | 0,7129 |
| 20:2n-6 | 0,0013 | 0,0009 | 1,5109 | 0,1394 | 0,1028 | 0,8321 | 0,7921 |
| 16:1,n,10,,7me,,b, | 0,0013 | 0,0009 | 1,5302 | 0,0752 | 0,1099 | 0,8405 | 0,9604 |
| 15:00 | 0,0013 | 0,0009 | 1,3265 | 0,1593 | 0,1724 | 0,8486 | 1,0000 |
| 16:1,n,10,,7me,,a, | 0,0012 | 0,0009 | 1,4087 | 0,0586 | 0,0909 | 0,8565 | 0,0099 |
| 24:6n-3 | 0,0012 | 0,0011 | 1,0200 | 0,0770 | 0,0533 | 0,8640 | 0,7921 |
| 17:1n-8 | 0,0012 | 0,0008 | 1,4403 | 0,1410 | 0,1145 | 0,8714 | 1,0000 |
| 18:3n-6 | 0,0011 | 0,0005 | 2,4024 | 0,0296 | 0,0636 | 0,8787 | 0,8911 |
| 24:1n-7 | 0,0011 | 0,0009 | 1,2297 | 0,0799 | 0,0811 | 0,8859 | 0,9802 |
| 16:1n-5 | 0,0011 | 0,0007 | 1,6471 | 0,0745 | 0,1059 | 0,8930 | 0,9901 |
| i:18:0 | 0,0011 | 0,0007 | 1,4711 | 0,0668 | 0,0462 | 0,9001 | 0,0495 |
| i:15:0 | 0,0010 | 0,0007 | 1,5144 | 0,0760 | 0,1037 | 0,9068 | 0,9505 |
| 16:1n-9 | 0,0009 | 0,0010 | 0,9553 | 0,1018 | 0,0967 | 0,9127 | 1,0000 |
| 16:4n-3 | 0,0009 | 0,0006 | 1,5826 | 0,0178 | 0,0371 | 0,9184 | 0,9505 |
| 20:00 | 0,0009 | 0,0008 | 1,1438 | 0,0666 | 0,0736 | 0,9241 | 1,0000 |
| 20:3:n-3 | 0,0009 | 0,0007 | 1,2166 | 0,0985 | 0,0981 | 0,9296 | 1,0000 |
| i:17:0 | 0,0008 | 0,0007 | 1,1665 | 0,1000 | 0,0883 | 0,9350 | 1,0000 |
| 22:1n-7 | 0,0008 | 0,0006 | 1,2534 | 0,0651 | 0,0486 | 0,9400 | 1,0000 |
| 18:4n-1 | 0,0008 | 0,0006 | 1,3558 | 0,0515 | 0,0614 | 0,9450 | 1,0000 |
| 18:3n-4 | 0,0008 | 0,0004 | 1,7293 | 0,0334 | 0,0116 | 0,9498 | 0,0099 |
| 20:3n-6 | 0,0007 | 0,0005 | 1,6167 | 0,0536 | 0,0318 | 0,9545 | 0,2673 |
| 22:00 | 0,0007 | 0,0009 | 0,7602 | 0,0429 | 0,0290 | 0,9591 | 0,8614 |
| Phytanic_acid | 0,0006 | 0,0012 | 0,5613 | 0,0369 | 0,0234 | 0,9632 | 1,0000 |
| 16:2n-7 | 0,0006 | 0,0003 | 1,8671 | 0,0073 | 0,0254 | 0,9671 | 0,0099 |
| 22:4n-3 | 0,0006 | 0,0005 | 1,2092 | 0,0575 | 0,0484 | 0,9708 | 1,0000 |
| 18:2n-4 | 0,0006 | 0,0004 | 1,2299 | 0,0682 | 0,0708 | 0,9743 | 1,0000 |
| 18:2n-7 | 0,0005 | 0,0004 | 1,4825 | 0,0446 | 0,0306 | 0,9777 | 0,2475 |
| Pristanic_acid | 0,0005 | 0,0004 | 1,3008 | 0,0109 | 0,0218 | 0,9807 | 1,0000 |
| 24:0 | 0,0004 | 0,0005 | 0,8663 | 0,0218 | 0,0115 | 0,9835 | 1,0000 |
| 16:1n-11 | 0,0004 | 0,0004 | 1,1248 | 0,0337 | 0,0227 | 0,9861 | 1,0000 |
| ai:17:0 | 0,0004 | 0,0003 | 1,2179 | 0,0395 | 0,0339 | 0,9887 | 1,0000 |
| 17:1n-7 | 0,0003 | 0,0008 | 0,4325 | 0,0173 | 0,0103 | 0,9908 | 0,6832 |
| i:16:0 | 0,0003 | 0,0003 | 1,1051 | 0,0284 | 0,0258 | 0,9928 | 1,0000 |
| 14:1n-5 | 0,0003 | 0,0002 | 1,4403 | 0,0163 | 0,0190 | 0,9947 | 1,0000 |
| ai:15:0 | 0,0003 | 0,0002 | 1,2920 | 0,0253 | 0,0294 | 0,9967 | 1,0000 |
| 17:1n-10 | 0,0003 | 0,0002 | 1,6189 | 0,0141 | 0,0096 | 0,9983 | 0,0099 |
| 16:2n-6 | 0,0003 | 0,0002 | 1,6482 | 0,0107 | 0,0149 | 1,0000 | 0,0198 |

Table S22. Output of SIMPER analyses for each fatty acid (log 10 transformed values); Post-smolts (TAG) and herring (Adults).

| FA | average | sd | ratio | ava | avb | cumsum | p |
| --- | --- | --- | --- | --- | --- | --- | --- |
| 18:4n-3 | 0,0131 | 0,0046 | 2,8321 | 0,3612 | 0,7584 | 0,0836 | 0,0099 |
| 22:1n-11 | 0,0094 | 0,0072 | 1,3076 | 0,9019 | 1,1644 | 0,1438 | 1,0000 |
| 14:00 | 0,0079 | 0,0036 | 2,2223 | 0,6419 | 0,8836 | 0,1947 | 0,0099 |
| 18:1n-9 | 0,0078 | 0,0051 | 1,5314 | 1,1758 | 0,9685 | 0,2444 | 0,8119 |
| 22:5n-3 | 0,0066 | 0,0036 | 1,8432 | 0,5322 | 0,3379 | 0,2865 | 0,6139 |
| 22:6n-3 | 0,0060 | 0,0039 | 1,5676 | 1,1468 | 1,0738 | 0,3252 | 1,0000 |
| 20:1n-9 | 0,0057 | 0,0052 | 1,0941 | 0,8907 | 0,9584 | 0,3615 | 1,0000 |
| 18:00 | 0,0052 | 0,0044 | 1,1739 | 0,6264 | 0,5055 | 0,3946 | 1,0000 |
| 18:1n-11 | 0,0050 | 0,0026 | 1,9027 | 0,2717 | 0,1236 | 0,4263 | 0,0099 |
| 20:5n-3 | 0,0046 | 0,0037 | 1,2440 | 0,8500 | 0,9197 | 0,4558 | 1,0000 |
| 20:1n-11 | 0,0046 | 0,0026 | 1,7389 | 0,3617 | 0,2582 | 0,4851 | 1,0000 |
| 16:4n-1 | 0,0044 | 0,0022 | 2,0367 | 0,0212 | 0,1563 | 0,5134 | 0,0099 |
| 18:3n-3 | 0,0040 | 0,0023 | 1,7760 | 0,2808 | 0,3927 | 0,5391 | 0,2673 |
| 24:1n-9 | 0,0038 | 0,0040 | 0,9593 | 0,3751 | 0,2816 | 0,5638 | 0,9802 |
| 18:1n-7 | 0,0038 | 0,0026 | 1,4574 | 0,5312 | 0,4330 | 0,5882 | 1,0000 |
| 20:4n-3 | 0,0038 | 0,0024 | 1,6164 | 0,4113 | 0,3122 | 0,6127 | 1,0000 |
| 16:1n-7 | 0,0036 | 0,0026 | 1,3947 | 0,6664 | 0,6656 | 0,6356 | 1,0000 |
| 22:1n-9 | 0,0031 | 0,0024 | 1,2924 | 0,3356 | 0,3277 | 0,6557 | 1,0000 |
| 16:00 | 0,0029 | 0,0024 | 1,2114 | 1,1619 | 1,1641 | 0,6743 | 1,0000 |
| 16:2n-4 | 0,0023 | 0,0012 | 1,9440 | 0,0531 | 0,1227 | 0,6890 | 0,0099 |
| 21:5n-3 | 0,0022 | 0,0012 | 1,7730 | 0,1070 | 0,1712 | 0,7029 | 0,0099 |
| 20:4n-6 | 0,0021 | 0,0016 | 1,3102 | 0,1710 | 0,1593 | 0,7162 | 1,0000 |
| 4,8,12,Me,13,0 | 0,0021 | 0,0011 | 1,8365 | 0,0314 | 0,0932 | 0,7294 | 0,0099 |
| 20:1n-7 | 0,0020 | 0,0014 | 1,4302 | 0,1344 | 0,1007 | 0,7423 | 0,9901 |
| 18:2n-6 | 0,0020 | 0,0020 | 0,9950 | 0,3907 | 0,3948 | 0,7552 | 1,0000 |
| 24:5n-3 | 0,0020 | 0,0017 | 1,1686 | 0,2061 | 0,1777 | 0,7679 | 1,0000 |
| 22:4n-6 | 0,0019 | 0,0021 | 0,8952 | 0,0775 | 0,0233 | 0,7801 | 0,0693 |
| 16:3n-4 | 0,0019 | 0,0010 | 1,9372 | 0,0080 | 0,0648 | 0,7920 | 0,0099 |
| 17:00 | 0,0018 | 0,0015 | 1,1987 | 0,1606 | 0,1330 | 0,8037 | 1,0000 |
| 18:1n-5 | 0,0017 | 0,0010 | 1,7213 | 0,1795 | 0,1343 | 0,8144 | 0,3069 |
| 22:5n-6 | 0,0014 | 0,0011 | 1,3239 | 0,1009 | 0,1149 | 0,8235 | 0,7129 |
| 20:2n-6 | 0,0013 | 0,0009 | 1,5109 | 0,1394 | 0,1028 | 0,8321 | 0,7921 |
| 16:1,n,10,,7me,,b, | 0,0013 | 0,0009 | 1,5302 | 0,0752 | 0,1099 | 0,8405 | 0,9604 |
| 15:00 | 0,0013 | 0,0009 | 1,3265 | 0,1593 | 0,1724 | 0,8486 | 1,0000 |
| 16:1,n,10,,7me,,a, | 0,0012 | 0,0009 | 1,4087 | 0,0586 | 0,0909 | 0,8565 | 0,0099 |
| 24:6n-3 | 0,0012 | 0,0011 | 1,0200 | 0,0770 | 0,0533 | 0,8640 | 0,7921 |
| 17:1n-8 | 0,0012 | 0,0008 | 1,4403 | 0,1410 | 0,1145 | 0,8714 | 1,0000 |
| 18:3n-6 | 0,0011 | 0,0005 | 2,4024 | 0,0296 | 0,0636 | 0,8787 | 0,8911 |
| 24:1n-7 | 0,0011 | 0,0009 | 1,2297 | 0,0799 | 0,0811 | 0,8859 | 0,9802 |
| 16:1n-5 | 0,0011 | 0,0007 | 1,6471 | 0,0745 | 0,1059 | 0,8930 | 0,9901 |
| i:18:0 | 0,0011 | 0,0007 | 1,4711 | 0,0668 | 0,0462 | 0,9001 | 0,0495 |
| i:15:0 | 0,0010 | 0,0007 | 1,5144 | 0,0760 | 0,1037 | 0,9068 | 0,9505 |
| 16:1n-9 | 0,0009 | 0,0010 | 0,9553 | 0,1018 | 0,0967 | 0,9127 | 1,0000 |
| 16:4n-3 | 0,0009 | 0,0006 | 1,5826 | 0,0178 | 0,0371 | 0,9184 | 0,9505 |
| 20:00 | 0,0009 | 0,0008 | 1,1438 | 0,0666 | 0,0736 | 0,9241 | 1,0000 |
| 20:3:n-3 | 0,0009 | 0,0007 | 1,2166 | 0,0985 | 0,0981 | 0,9296 | 1,0000 |
| i:17:0 | 0,0008 | 0,0007 | 1,1665 | 0,1000 | 0,0883 | 0,9350 | 1,0000 |
| 22:1n-7 | 0,0008 | 0,0006 | 1,2534 | 0,0651 | 0,0486 | 0,9400 | 1,0000 |
| 18:4n-1 | 0,0008 | 0,0006 | 1,3558 | 0,0515 | 0,0614 | 0,9450 | 1,0000 |
| 18:3n-4 | 0,0008 | 0,0004 | 1,7293 | 0,0334 | 0,0116 | 0,9498 | 0,0099 |
| 20:3n-6 | 0,0007 | 0,0005 | 1,6167 | 0,0536 | 0,0318 | 0,9545 | 0,2673 |
| 22:00 | 0,0007 | 0,0009 | 0,7602 | 0,0429 | 0,0290 | 0,9591 | 0,8614 |
| Phytanic_acid | 0,0006 | 0,0012 | 0,5613 | 0,0369 | 0,0234 | 0,9632 | 1,0000 |
| 16:2n-7 | 0,0006 | 0,0003 | 1,8671 | 0,0073 | 0,0254 | 0,9671 | 0,0099 |
| 22:4n-3 | 0,0006 | 0,0005 | 1,2092 | 0,0575 | 0,0484 | 0,9708 | 1,0000 |
| 18:2n-4 | 0,0006 | 0,0004 | 1,2299 | 0,0682 | 0,0708 | 0,9743 | 1,0000 |
| 18:2n-7 | 0,0005 | 0,0004 | 1,4825 | 0,0446 | 0,0306 | 0,9777 | 0,2475 |
| Pristanic_acid | 0,0005 | 0,0004 | 1,3008 | 0,0109 | 0,0218 | 0,9807 | 1,0000 |
| 24:0 | 0,0004 | 0,0005 | 0,8663 | 0,0218 | 0,0115 | 0,9835 | 1,0000 |
| 16:1n-11 | 0,0004 | 0,0004 | 1,1248 | 0,0337 | 0,0227 | 0,9861 | 1,0000 |
| ai:17:0 | 0,0004 | 0,0003 | 1,2179 | 0,0395 | 0,0339 | 0,9887 | 1,0000 |
| 17:1n-7 | 0,0003 | 0,0008 | 0,4325 | 0,0173 | 0,0103 | 0,9908 | 0,6832 |
| i:16:0 | 0,0003 | 0,0003 | 1,1051 | 0,0284 | 0,0258 | 0,9928 | 1,0000 |
| 14:1n-5 | 0,0003 | 0,0002 | 1,4403 | 0,0163 | 0,0190 | 0,9947 | 1,0000 |
| ai:15:0 | 0,0003 | 0,0002 | 1,2920 | 0,0253 | 0,0294 | 0,9967 | 1,0000 |
| 17:1n-10 | 0,0003 | 0,0002 | 1,6189 | 0,0141 | 0,0096 | 0,9983 | 0,0099 |
| 16:2n-6 | 0,0003 | 0,0002 | 1,6482 | 0,0107 | 0,0149 | 1,0000 | 0,0198 |

Table S23. Output of SIMPER analyses for each fatty acid (log 10 transformed values); Adult salmon (TAG) and mackerel.

| FA | average | sd | ratio | ava | avb | cumsum | p |
| --- | --- | --- | --- | --- | --- | --- | --- |
| 18:4n-3 | 0,0138 | 0,0049 | 2,8361 | 0,3403 | 0,7584 | 0,0979 | 0,0099 |
| 18:1n-9 | 0,0079 | 0,0049 | 1,5963 | 1,1978 | 0,9685 | 0,1536 | 0,6634 |
| 14:00 | 0,0060 | 0,0029 | 2,0840 | 0,7039 | 0,8836 | 0,1959 | 0,9109 |
| 18:1n-7 | 0,0059 | 0,0035 | 1,6953 | 0,6075 | 0,4330 | 0,2376 | 0,0990 |
| 18:1n-11 | 0,0054 | 0,0022 | 2,4602 | 0,2852 | 0,1236 | 0,2755 | 0,0099 |
| 22:1n-11 | 0,0053 | 0,0043 | 1,2336 | 1,0730 | 1,1644 | 0,3128 | 1,0000 |
| 22:5n-3 | 0,0052 | 0,0027 | 1,9392 | 0,4955 | 0,3379 | 0,3500 | 1,0000 |
| 18:3n-3 | 0,0050 | 0,0022 | 2,2269 | 0,2435 | 0,3927 | 0,3855 | 0,0099 |
| 20:1n-9 | 0,0049 | 0,0038 | 1,2842 | 1,0545 | 0,9584 | 0,4205 | 1,0000 |
| 20:1n-11 | 0,0048 | 0,0025 | 1,8706 | 0,3971 | 0,2582 | 0,4543 | 1,0000 |
| 20:5n-3 | 0,0043 | 0,0037 | 1,1745 | 0,8161 | 0,9197 | 0,4851 | 1,0000 |
| 22:6n-3 | 0,0043 | 0,0039 | 1,0860 | 0,9744 | 1,0738 | 0,5154 | 1,0000 |
| 16:1n-7 | 0,0039 | 0,0024 | 1,6383 | 0,7654 | 0,6656 | 0,5432 | 0,9802 |
| 16:4n-1 | 0,0037 | 0,0022 | 1,6829 | 0,0458 | 0,1563 | 0,5697 | 0,0099 |
| 22:1n-9 | 0,0037 | 0,0027 | 1,3857 | 0,4062 | 0,3277 | 0,5959 | 1,0000 |
| 18:00 | 0,0030 | 0,0023 | 1,3247 | 0,5352 | 0,5055 | 0,6174 | 1,0000 |
| 16:00 | 0,0029 | 0,0026 | 1,1105 | 1,1503 | 1,1641 | 0,6377 | 1,0000 |
| 20:4n-3 | 0,0028 | 0,0018 | 1,5786 | 0,3722 | 0,3122 | 0,6575 | 1,0000 |
| 20:1n-7 | 0,0026 | 0,0015 | 1,7102 | 0,1613 | 0,1007 | 0,6759 | 0,0297 |
| 18:1n-5 | 0,0021 | 0,0012 | 1,7481 | 0,1955 | 0,1343 | 0,6906 | 0,0099 |
| 21:5n-3 | 0,0020 | 0,0011 | 1,7523 | 0,1137 | 0,1712 | 0,7045 | 0,0099 |
| 24:1n-9 | 0,0019 | 0,0026 | 0,7322 | 0,3005 | 0,2816 | 0,7181 | 1,0000 |
| 18:2n-6 | 0,0019 | 0,0014 | 1,3374 | 0,3594 | 0,3948 | 0,7315 | 1,0000 |
| 4,8,12,Me,13,0 | 0,0019 | 0,0011 | 1,6934 | 0,0375 | 0,0932 | 0,7447 | 0,0099 |
| 24:5n-3 | 0,0018 | 0,0012 | 1,4715 | 0,1542 | 0,1777 | 0,7577 | 1,0000 |
| 20:4n-6 | 0,0018 | 0,0014 | 1,2761 | 0,1249 | 0,1593 | 0,7707 | 1,0000 |
| 22:5n-6 | 0,0018 | 0,0010 | 1,7812 | 0,0603 | 0,1149 | 0,7835 | 0,0099 |
| 16:1,n,10,,7me,,b, | 0,0016 | 0,0008 | 1,9597 | 0,0609 | 0,1099 | 0,7950 | 0,0099 |
| 17:00 | 0,0016 | 0,0010 | 1,5308 | 0,0877 | 0,1330 | 0,8060 | 1,0000 |
| 16:1,n,10,,7me,,a, | 0,0015 | 0,0009 | 1,6024 | 0,0451 | 0,0909 | 0,8168 | 0,0099 |
| 16:3n-4 | 0,0015 | 0,0010 | 1,5470 | 0,0204 | 0,0648 | 0,8275 | 0,0099 |
| 15:00 | 0,0015 | 0,0009 | 1,5850 | 0,1302 | 0,1724 | 0,8381 | 0,8614 |
| 16:2n-4 | 0,0014 | 0,0010 | 1,3627 | 0,0906 | 0,1227 | 0,8481 | 0,9802 |
| 20:2n-6 | 0,0013 | 0,0008 | 1,6402 | 0,1375 | 0,1028 | 0,8571 | 0,8614 |
| 18:3n-6 | 0,0013 | 0,0004 | 3,2913 | 0,0250 | 0,0636 | 0,8661 | 0,5842 |
| i:15:0 | 0,0011 | 0,0007 | 1,5333 | 0,0734 | 0,1037 | 0,8737 | 0,9208 |
| 24:1n-7 | 0,0010 | 0,0008 | 1,2163 | 0,0794 | 0,0811 | 0,8809 | 1,0000 |
| 18:4n-1 | 0,0009 | 0,0008 | 1,2020 | 0,0780 | 0,0614 | 0,8876 | 0,2772 |
| i:18:0 | 0,0009 | 0,0007 | 1,3324 | 0,0589 | 0,0462 | 0,8943 | 0,8218 |
| 16:4n-3 | 0,0009 | 0,0006 | 1,6737 | 0,0150 | 0,0371 | 0,9009 | 0,8713 |
| 22:1n-7 | 0,0009 | 0,0006 | 1,4240 | 0,0732 | 0,0486 | 0,9074 | 1,0000 |
| Phytanic_acid | 0,0009 | 0,0012 | 0,7724 | 0,0490 | 0,0234 | 0,9139 | 0,9901 |
| 20:3:n-3 | 0,0008 | 0,0007 | 1,2402 | 0,0839 | 0,0981 | 0,9197 | 1,0000 |
| 20:00 | 0,0008 | 0,0005 | 1,7181 | 0,0507 | 0,0736 | 0,9256 | 1,0000 |
| 16:1n-5 | 0,0008 | 0,0006 | 1,2185 | 0,0907 | 0,1059 | 0,9312 | 1,0000 |
| 22:4n-6 | 0,0008 | 0,0007 | 1,0860 | 0,0409 | 0,0233 | 0,9368 | 1,0000 |
| 17:1n-8 | 0,0008 | 0,0005 | 1,4396 | 0,1133 | 0,1145 | 0,9423 | 1,0000 |
| i:17:0 | 0,0007 | 0,0006 | 1,1787 | 0,0781 | 0,0883 | 0,9473 | 1,0000 |
| 16:1n-9 | 0,0007 | 0,0007 | 0,9865 | 0,0812 | 0,0967 | 0,9523 | 1,0000 |
| 24:6n-3 | 0,0007 | 0,0005 | 1,4006 | 0,0428 | 0,0533 | 0,9570 | 1,0000 |
| 16:2n-7 | 0,0006 | 0,0004 | 1,6413 | 0,0095 | 0,0254 | 0,9612 | 0,0099 |
| 18:3n-4 | 0,0006 | 0,0004 | 1,4465 | 0,0285 | 0,0116 | 0,9653 | 0,9010 |
| 20:3n-6 | 0,0005 | 0,0003 | 1,6640 | 0,0467 | 0,0318 | 0,9690 | 1,0000 |
| 18:2n-4 | 0,0005 | 0,0004 | 1,2015 | 0,0681 | 0,0708 | 0,9725 | 1,0000 |
| Pristanic_acid | 0,0005 | 0,0005 | 1,0391 | 0,0271 | 0,0218 | 0,9759 | 1,0000 |
| 22:00 | 0,0004 | 0,0005 | 0,8033 | 0,0223 | 0,0290 | 0,9788 | 1,0000 |
| 22:4n-3 | 0,0004 | 0,0003 | 1,3762 | 0,0455 | 0,0484 | 0,9814 | 1,0000 |
| 18:2n-7 | 0,0004 | 0,0002 | 1,5881 | 0,0386 | 0,0306 | 0,9839 | 1,0000 |
| 16:1n-11 | 0,0003 | 0,0006 | 0,5645 | 0,0308 | 0,0227 | 0,9863 | 1,0000 |
| 14:1n-5 | 0,0003 | 0,0003 | 1,1771 | 0,0272 | 0,0190 | 0,9886 | 1,0000 |
| i:16:0 | 0,0003 | 0,0003 | 1,1208 | 0,0264 | 0,0258 | 0,9907 | 1,0000 |
| ai:15:0 | 0,0003 | 0,0002 | 1,3409 | 0,0247 | 0,0294 | 0,9926 | 1,0000 |
| ai:17:0 | 0,0003 | 0,0002 | 1,1522 | 0,0321 | 0,0339 | 0,9945 | 1,0000 |
| 16:2n-6 | 0,0002 | 0,0001 | 1,8038 | 0,0110 | 0,0149 | 0,9961 | 0,3069 |
| 17:1n-10 | 0,0002 | 0,0001 | 1,4646 | 0,0113 | 0,0096 | 0,9976 | 0,7129 |
| 17:1n-7 | 0,0002 | 0,0003 | 0,5591 | 0,0077 | 0,0103 | 0,9988 | 1,0000 |
| 01,01,1900 00:00:00 | 0,0002 | 0,0002 | 1,0810 | 0,0108 | 0,0115 | 1,0000 | 1,0000 |

Table S24. Output of SIMPER analyses for each fatty acid (log 10 transformed values); Adult salmon (TAG) and herring (adults).

| FA | average | sd | ratio | ava | avb | cumsum | p |
| --- | --- | --- | --- | --- | --- | --- | --- |
| 18:4n-3 | 0,0129 | 0,0055 | 2,3333 | 0,3403 | 0,7186 | 0,0821 | 0,0099 |
| 18:1n-9 | 0,0103 | 0,0052 | 1,9922 | 1,1978 | 0,9021 | 0,1476 | 0,0099 |
| 18:1n-7 | 0,0090 | 0,0034 | 2,6261 | 0,6075 | 0,3435 | 0,2047 | 0,0099 |
| 14:00 | 0,0085 | 0,0029 | 2,9189 | 0,7039 | 0,9526 | 0,2585 | 0,0099 |
| 22:5n-3 | 0,0082 | 0,0027 | 3,0322 | 0,4955 | 0,2507 | 0,3108 | 0,0099 |
| 22:1n-11 | 0,0076 | 0,0049 | 1,5469 | 1,0730 | 1,2847 | 0,3593 | 1,0000 |
| 18:00 | 0,0075 | 0,0031 | 2,3885 | 0,5352 | 0,3202 | 0,4072 | 0,0099 |
| 20:4n-3 | 0,0057 | 0,0023 | 2,4211 | 0,3722 | 0,2031 | 0,4433 | 0,0099 |
| 16:4n-1 | 0,0053 | 0,0025 | 2,1267 | 0,0458 | 0,2016 | 0,4769 | 0,0099 |
| 18:1n-11 | 0,0049 | 0,0021 | 2,2716 | 0,2852 | 0,1422 | 0,5079 | 0,0099 |
| 18:3n-3 | 0,0043 | 0,0023 | 1,8894 | 0,2435 | 0,3622 | 0,5350 | 0,0693 |
| 20:5n-3 | 0,0042 | 0,0037 | 1,1237 | 0,8161 | 0,8981 | 0,5618 | 1,0000 |
| 20:1n-11 | 0,0040 | 0,0025 | 1,6190 | 0,3971 | 0,2927 | 0,5871 | 1,0000 |
| 22:6n-3 | 0,0038 | 0,0035 | 1,0843 | 0,9744 | 0,9698 | 0,6114 | 1,0000 |
| 22:1n-9 | 0,0037 | 0,0026 | 1,4380 | 0,4062 | 0,3029 | 0,6353 | 1,0000 |
| 20:1n-9 | 0,0037 | 0,0032 | 1,1660 | 1,0545 | 1,0503 | 0,6590 | 1,0000 |
| 20:1n-7 | 0,0032 | 0,0014 | 2,3092 | 0,1613 | 0,0667 | 0,6792 | 0,0099 |
| 16:1n-7 | 0,0028 | 0,0022 | 1,3057 | 0,7654 | 0,7356 | 0,6973 | 1,0000 |
| 16:00 | 0,0027 | 0,0025 | 1,0506 | 1,1503 | 1,1408 | 0,7143 | 1,0000 |
| 16:2n-4 | 0,0022 | 0,0014 | 1,5779 | 0,0906 | 0,1511 | 0,7285 | 0,0099 |
| 18:1n-5 | 0,0022 | 0,0013 | 1,7140 | 0,1955 | 0,1350 | 0,7425 | 0,0099 |
| 24:1n-9 | 0,0021 | 0,0028 | 0,7715 | 0,3005 | 0,2497 | 0,7562 | 1,0000 |
| 16:3n-4 | 0,0020 | 0,0014 | 1,5046 | 0,0204 | 0,0802 | 0,7692 | 0,0099 |
| 18:2n-6 | 0,0018 | 0,0013 | 1,3367 | 0,3594 | 0,3832 | 0,7807 | 1,0000 |
| 24:5n-3 | 0,0018 | 0,0012 | 1,5427 | 0,1542 | 0,2030 | 0,7921 | 1,0000 |
| 20:2n-6 | 0,0018 | 0,0007 | 2,4845 | 0,1375 | 0,0844 | 0,8035 | 0,0198 |
| 4,8,12,Me,13,0 | 0,0016 | 0,0008 | 2,1700 | 0,0375 | 0,0852 | 0,8139 | 0,0099 |
| 21:5n-3 | 0,0015 | 0,0010 | 1,5187 | 0,1137 | 0,1470 | 0,8236 | 0,2871 |
| Pristanic_acid | 0,0013 | 0,0008 | 1,5965 | 0,0271 | 0,0637 | 0,8321 | 0,0099 |
| 15:00 | 0,0013 | 0,0007 | 1,7972 | 0,1302 | 0,1656 | 0,8402 | 1,0000 |
| 20:4n-6 | 0,0013 | 0,0014 | 0,9149 | 0,1249 | 0,1229 | 0,8483 | 1,0000 |
| 24:1n-7 | 0,0011 | 0,0008 | 1,4584 | 0,0794 | 0,1102 | 0,8556 | 0,8911 |
| 20:00 | 0,0010 | 0,0005 | 2,2438 | 0,0507 | 0,0794 | 0,8621 | 0,7822 |
| 18:3n-6 | 0,0010 | 0,0004 | 2,3895 | 0,0250 | 0,0548 | 0,8685 | 0,8911 |
| 16:4n-3 | 0,0010 | 0,0006 | 1,7803 | 0,0150 | 0,0414 | 0,8749 | 0,7723 |
| i:15:0 | 0,0009 | 0,0006 | 1,6790 | 0,0734 | 0,1002 | 0,8809 | 1,0000 |
| 18:4n-1 | 0,0009 | 0,0008 | 1,1475 | 0,0780 | 0,0570 | 0,8869 | 0,2772 |
| 16:1,n,10,,7me,,b, | 0,0009 | 0,0006 | 1,5028 | 0,0609 | 0,0871 | 0,8929 | 1,0000 |
| i:18:0 | 0,0009 | 0,0005 | 1,7439 | 0,0589 | 0,0350 | 0,8986 | 0,9109 |
| 20:3:n-3 | 0,0009 | 0,0006 | 1,4599 | 0,0839 | 0,0671 | 0,9044 | 1,0000 |
| Phytanic_acid | 0,0009 | 0,0012 | 0,7780 | 0,0490 | 0,0398 | 0,9102 | 0,9901 |
| 22:1n-7 | 0,0009 | 0,0006 | 1,3705 | 0,0732 | 0,0486 | 0,9157 | 1,0000 |
| 17:1n-8 | 0,0009 | 0,0006 | 1,4289 | 0,1133 | 0,1009 | 0,9212 | 1,0000 |
| 22:5n-6 | 0,0008 | 0,0006 | 1,3979 | 0,0603 | 0,0788 | 0,9266 | 1,0000 |
| 18:2n-4 | 0,0008 | 0,0005 | 1,5750 | 0,0681 | 0,0453 | 0,9318 | 0,5050 |
| 22:4n-6 | 0,0008 | 0,0007 | 1,1624 | 0,0409 | 0,0289 | 0,9370 | 1,0000 |
| 16:1n-5 | 0,0008 | 0,0007 | 1,2176 | 0,0907 | 0,1091 | 0,9422 | 1,0000 |
| 17:00 | 0,0007 | 0,0005 | 1,3852 | 0,0877 | 0,0863 | 0,9466 | 1,0000 |
| 16:2n-7 | 0,0007 | 0,0004 | 1,7816 | 0,0095 | 0,0283 | 0,9509 | 0,0099 |
| 24:6n-3 | 0,0007 | 0,0004 | 1,5194 | 0,0428 | 0,0401 | 0,9553 | 1,0000 |
| i:17:0 | 0,0006 | 0,0005 | 1,1965 | 0,0781 | 0,0792 | 0,9594 | 1,0000 |
| 20:3n-6 | 0,0006 | 0,0003 | 1,9021 | 0,0467 | 0,0285 | 0,9633 | 1,0000 |
| 18:3n-4 | 0,0006 | 0,0004 | 1,5273 | 0,0285 | 0,0105 | 0,9672 | 0,3762 |
| 16:1,n,10,,7me,,a, | 0,0006 | 0,0004 | 1,3810 | 0,0451 | 0,0529 | 0,9711 | 1,0000 |
| 18:2n-7 | 0,0006 | 0,0003 | 2,1998 | 0,0386 | 0,0208 | 0,9749 | 0,0099 |
| 22:00 | 0,0005 | 0,0006 | 0,8229 | 0,0223 | 0,0324 | 0,9781 | 1,0000 |
| 22:4n-3 | 0,0005 | 0,0004 | 1,2916 | 0,0455 | 0,0469 | 0,9812 | 1,0000 |
| 16:1n-9 | 0,0005 | 0,0005 | 0,9385 | 0,0812 | 0,0809 | 0,9842 | 1,0000 |
| ai:17:0 | 0,0004 | 0,0003 | 1,6744 | 0,0321 | 0,0204 | 0,9871 | 1,0000 |
| 16:1n-11 | 0,0004 | 0,0006 | 0,5998 | 0,0308 | 0,0225 | 0,9894 | 1,0000 |
| ai:15:0 | 0,0003 | 0,0002 | 1,5706 | 0,0247 | 0,0335 | 0,9915 | 1,0000 |
| 17:1n-7 | 0,0003 | 0,0003 | 1,0027 | 0,0077 | 0,0150 | 0,9936 | 0,6931 |
| 14:1n-5 | 0,0003 | 0,0003 | 1,0861 | 0,0272 | 0,0234 | 0,9956 | 1,0000 |
| 24:0 | 0,0002 | 0,0002 | 1,0531 | 0,0108 | 0,0108 | 0,9968 | 1,0000 |
| 16:2n-6 | 0,0002 | 0,0001 | 1,6740 | 0,0110 | 0,0154 | 0,9979 | 1,0000 |
| i:16:0 | 0,0002 | 0,0001 | 1,2013 | 0,0264 | 0,0266 | 0,9990 | 1,0000 |
| 17:1n-10 | 0,0002 | 0,0001 | 1,4814 | 0,0113 | 0,0085 | 1,0000 | 1,0000 |

Table S25. Output of SIMPER analyses for each fatty acid (log 10 transformed values); Post-smolts (TAG) and herring larvae.

| FA | average | sd | ratio | ava | avb | cumsum | p |
| --- | --- | --- | --- | --- | --- | --- | --- |
| 22:1n-11 | 0,0290 | 0,0079 | 3,6633 | 0,9019 | 0,0904 | 0,1219 | 0,0099 |
| 20:1n-9 | 0,0253 | 0,0072 | 3,5118 | 0,8907 | 0,1839 | 0,2280 | 0,0099 |
| 20:5n-3 | 0,0131 | 0,0058 | 2,2655 | 0,8500 | 1,2155 | 0,2830 | 0,0099 |
| 22:6n-3 | 0,0126 | 0,0074 | 1,7092 | 1,1468 | 1,4972 | 0,3360 | 0,0099 |
| 18:1n-9 | 0,0115 | 0,0054 | 2,1223 | 1,1758 | 0,8556 | 0,3844 | 0,0099 |
| 20:1n-11 | 0,0114 | 0,0042 | 2,7070 | 0,3617 | 0,0415 | 0,4325 | 0,0099 |
| 22:1n-9 | 0,0108 | 0,0033 | 3,2539 | 0,3356 | 0,0334 | 0,4778 | 0,0099 |
| 22:5n-3 | 0,0085 | 0,0040 | 2,1254 | 0,5322 | 0,2952 | 0,5135 | 0,0099 |
| 20:4n-3 | 0,0082 | 0,0029 | 2,8176 | 0,4113 | 0,1820 | 0,5479 | 0,0099 |
| 0,583333333 | 0,0069 | 0,0030 | 2,2587 | 0,6419 | 0,4543 | 0,5767 | 0,2376 |
| 18:1n-7 | 0,0061 | 0,0027 | 2,2293 | 0,5312 | 0,6999 | 0,6021 | 0,1089 |
| 0,666666667 | 0,0056 | 0,0027 | 2,0956 | 1,1619 | 1,3033 | 0,6256 | 0,0099 |
| 18:1n-11 | 0,0052 | 0,0028 | 1,8751 | 0,2717 | 0,1313 | 0,6472 | 0,0099 |
| Phytanic_acid | 0,0048 | 0,0035 | 1,3770 | 0,0369 | 0,1638 | 0,6672 | 0,0099 |
| 0,75 | 0,0047 | 0,0031 | 1,5031 | 0,6264 | 0,6523 | 0,6870 | 1,0000 |
| 18:4n-3 | 0,0041 | 0,0030 | 1,3569 | 0,3612 | 0,4038 | 0,7041 | 1,0000 |
| 16:1n-7 | 0,0040 | 0,0029 | 1,3792 | 0,6664 | 0,6373 | 0,7208 | 0,9703 |
| 24:1n-9 | 0,0038 | 0,0036 | 1,0554 | 0,3751 | 0,3511 | 0,7366 | 0,9406 |
| 18:2n-6 | 0,0031 | 0,0027 | 1,1762 | 0,3907 | 0,3150 | 0,7498 | 0,0099 |
| 18:3n-3 | 0,0031 | 0,0023 | 1,3734 | 0,2808 | 0,1985 | 0,7628 | 1,0000 |
| 20:2n-6 | 0,0029 | 0,0009 | 3,0371 | 0,1394 | 0,0590 | 0,7749 | 0,0099 |
| 16:1,n,10,,7me,,b, | 0,0027 | 0,0011 | 2,5346 | 0,0752 | 0,1512 | 0,7863 | 0,0099 |
| 20:4n-6 | 0,0027 | 0,0017 | 1,5942 | 0,1710 | 0,2191 | 0,7978 | 0,9406 |
| 24:5n-3 | 0,0025 | 0,0018 | 1,3940 | 0,2061 | 0,1447 | 0,8082 | 0,1386 |
| 22:4n-6 | 0,0024 | 0,0022 | 1,0689 | 0,0775 | 0,0378 | 0,8181 | 0,0099 |
| 20:1n-7 | 0,0021 | 0,0014 | 1,4707 | 0,1344 | 0,0895 | 0,8271 | 0,7723 |
| 20:3:n-3 | 0,0021 | 0,0010 | 2,2149 | 0,0985 | 0,0388 | 0,8360 | 0,0099 |
| 0,708333333 | 0,0020 | 0,0016 | 1,1926 | 0,1606 | 0,1335 | 0,8442 | 0,8713 |
| 16:1n-5 | 0,0019 | 0,0006 | 2,8791 | 0,0745 | 0,1262 | 0,8520 | 0,0099 |
| 16:1,n,10,,7me,,a, | 0,0018 | 0,0015 | 1,1921 | 0,0586 | 0,0957 | 0,8597 | 0,0099 |
| 0,833333333 | 0,0017 | 0,0012 | 1,3914 | 0,0666 | 0,0188 | 0,8668 | 0,0099 |
| 16:2n-4 | 0,0015 | 0,0011 | 1,3571 | 0,0531 | 0,0873 | 0,8733 | 0,8515 |
| 22:5n-6 | 0,0015 | 0,0012 | 1,2634 | 0,1009 | 0,1089 | 0,8796 | 0,3762 |
| 21:5n-3 | 0,0015 | 0,0011 | 1,3305 | 0,1070 | 0,1297 | 0,8858 | 0,4455 |
| 24:1n-7 | 0,0015 | 0,0010 | 1,5217 | 0,0799 | 0,0409 | 0,8920 | 0,0099 |
| 16:3n-4 | 0,0014 | 0,0009 | 1,5404 | 0,0080 | 0,0455 | 0,8978 | 0,1584 |
| 17:1n-8 | 0,0013 | 0,0009 | 1,4517 | 0,1410 | 0,1124 | 0,9031 | 0,8614 |
| i:17:0 | 0,0013 | 0,0008 | 1,5283 | 0,1000 | 0,1118 | 0,9084 | 0,3861 |
| 24:6n-3 | 0,0012 | 0,0012 | 1,0239 | 0,0770 | 0,0529 | 0,9136 | 0,4752 |
| 18:1n-5 | 0,0012 | 0,0009 | 1,2435 | 0,1795 | 0,1892 | 0,9185 | 1,0000 |
| 16:1n-9 | 0,0012 | 0,0009 | 1,2790 | 0,1018 | 0,1176 | 0,9235 | 0,2970 |
| 18:2n-4 | 0,0011 | 0,0007 | 1,4830 | 0,0682 | 0,0566 | 0,9280 | 0,0693 |
| 20:3n-6 | 0,0011 | 0,0006 | 1,8767 | 0,0536 | 0,0247 | 0,9326 | 0,0099 |
| 0,625 | 0,0011 | 0,0010 | 1,0779 | 0,1593 | 0,1528 | 0,9371 | 1,0000 |
| ai:17:0 | 0,0010 | 0,0018 | 0,5738 | 0,0395 | 0,0658 | 0,9414 | 0,0099 |
| i:18:0 | 0,0010 | 0,0006 | 1,6607 | 0,0668 | 0,0915 | 0,9457 | 0,3069 |
| 18:3n-4 | 0,0010 | 0,0005 | 2,0357 | 0,0334 | 0,0055 | 0,9499 | 0,0099 |
| 16:1n-11 | 0,0010 | 0,0007 | 1,4416 | 0,0337 | 0,0586 | 0,9541 | 0,0099 |
| 22:4n-3 | 0,0010 | 0,0007 | 1,4313 | 0,0575 | 0,0316 | 0,9581 | 0,0099 |
| 0,916666667 | 0,0009 | 0,0011 | 0,8162 | 0,0429 | 0,0208 | 0,9619 | 0,0693 |
| i:15:0 | 0,0008 | 0,0006 | 1,3281 | 0,0760 | 0,0580 | 0,9654 | 1,0000 |
| 22:1n-7 | 0,0008 | 0,0007 | 1,2165 | 0,0651 | 0,0505 | 0,9689 | 1,0000 |
| 18:4n-1 | 0,0008 | 0,0005 | 1,4473 | 0,0515 | 0,0349 | 0,9722 | 0,9604 |
| 16:4n-1 | 0,0007 | 0,0008 | 0,9032 | 0,0212 | 0,0287 | 0,9753 | 1,0000 |
| 18:2n-7 | 0,0007 | 0,0005 | 1,5583 | 0,0446 | 0,0257 | 0,9782 | 0,0099 |
| 24:0 | 0,0007 | 0,0009 | 0,8026 | 0,0218 | 0,0291 | 0,9811 | 0,9604 |
| 4,8,12,Me,13,0 | 0,0005 | 0,0006 | 0,9041 | 0,0314 | 0,0255 | 0,9833 | 1,0000 |
| 16:2n-7 | 0,0005 | 0,0004 | 1,2491 | 0,0073 | 0,0186 | 0,9854 | 0,0198 |
| 16:4n-3 | 0,0005 | 0,0004 | 1,1588 | 0,0178 | 0,0116 | 0,9875 | 1,0000 |
| 14:1n-5 | 0,0005 | 0,0003 | 1,6129 | 0,0163 | 0,0030 | 0,9895 | 1,0000 |
| 17:1n-7 | 0,0004 | 0,0008 | 0,5686 | 0,0173 | 0,0169 | 0,9914 | 0,0990 |
| 18:3n-6 | 0,0004 | 0,0003 | 1,3355 | 0,0296 | 0,0315 | 0,9931 | 1,0000 |
| 17:1n-10 | 0,0004 | 0,0002 | 1,6963 | 0,0141 | 0,0237 | 0,9947 | 0,0099 |
| ai:15:0 | 0,0004 | 0,0003 | 1,2988 | 0,0253 | 0,0187 | 0,9962 | 1,0000 |
| Pristanic_acid | 0,0004 | 0,0004 | 0,9772 | 0,0109 | 0,0149 | 0,9976 | 1,0000 |
| i:16:0 | 0,0003 | 0,0002 | 1,4515 | 0,0284 | 0,0366 | 0,9991 | 1,0000 |
| 16:2n-6 | 0,0002 | 0,0002 | 1,0728 | 0,0107 | 0,0076 | 1,0000 | 0,3663 |

Table S26. Output of SIMPER analyses for each fatty acid (log 10 transformed values); Post-smolts (TAG) and *Calanus finmarchicus*.

| FA | average | sd | ratio | ava | avb | cumsum | p |
| --- | --- | --- | --- | --- | --- | --- | --- |
| 18:1n-9 | 0,0167 | 0,0056 | 3,0065 | 1,1758 | 0,6773 | 0,0689 | 0,0099 |
| 18:4n-3 | 0,0163 | 0,0073 | 2,2305 | 0,3612 | 0,8420 | 0,1359 | 0,0099 |
| 14:00 | 0,0147 | 0,0037 | 3,9875 | 0,6419 | 1,0795 | 0,1963 | 0,0099 |
| 22:5n-3 | 0,0129 | 0,0039 | 3,3428 | 0,5322 | 0,1463 | 0,2493 | 0,0099 |
| 22:1n-11 | 0,0109 | 0,0080 | 1,3626 | 0,9019 | 1,1998 | 0,2943 | 0,9604 |
| 18:00 | 0,0101 | 0,0057 | 1,7770 | 0,6264 | 0,3338 | 0,3357 | 0,0099 |
| 18:1n-7 | 0,0092 | 0,0035 | 2,6351 | 0,5312 | 0,2600 | 0,3735 | 0,0099 |
| 22:6n-3 | 0,0090 | 0,0060 | 1,5153 | 1,1468 | 0,9517 | 0,4107 | 0,0099 |
| 18:1n-11 | 0,0079 | 0,0027 | 2,9596 | 0,2717 | 0,0347 | 0,4433 | 0,0099 |
| 20:1n-11 | 0,0078 | 0,0037 | 2,1021 | 0,3617 | 0,1315 | 0,4756 | 0,0099 |
| 20:1n-9 | 0,0072 | 0,0065 | 1,1164 | 0,8907 | 1,0746 | 0,5053 | 1,0000 |
| 18:3n-3 | 0,0069 | 0,0044 | 1,5784 | 0,2808 | 0,4819 | 0,5337 | 0,0099 |
| 20:4n-3 | 0,0060 | 0,0028 | 2,1108 | 0,4113 | 0,2347 | 0,5582 | 0,0099 |
| 18:3n-6 | 0,0058 | 0,0056 | 1,0392 | 0,0296 | 0,2031 | 0,5819 | 0,0099 |
| 20:5n-3 | 0,0056 | 0,0045 | 1,2418 | 0,8500 | 0,9675 | 0,6049 | 1,0000 |
| 24:1n-9 | 0,0051 | 0,0043 | 1,1790 | 0,3751 | 0,2716 | 0,6257 | 0,0792 |
| 16:4n-1 | 0,0050 | 0,0040 | 1,2584 | 0,0212 | 0,1709 | 0,6464 | 0,0099 |
| 16:1n-7 | 0,0050 | 0,0037 | 1,3706 | 0,6664 | 0,6439 | 0,6671 | 0,0198 |
| 22:1n-7 | 0,0044 | 0,0023 | 1,9202 | 0,0651 | 0,1955 | 0,6851 | 0,0099 |
| 22:1n-9 | 0,0041 | 0,0034 | 1,1972 | 0,3356 | 0,4196 | 0,7018 | 1,0000 |
| 24:5n-3 | 0,0041 | 0,0019 | 2,1847 | 0,2061 | 0,0852 | 0,7185 | 0,0099 |
| 16:00 | 0,0036 | 0,0031 | 1,1714 | 1,1619 | 1,0844 | 0,7333 | 0,9208 |
| 15:00 | 0,0030 | 0,0017 | 1,7373 | 0,1593 | 0,2427 | 0,7457 | 0,0099 |
| 4,8,12,Me,13,0 | 0,0029 | 0,0019 | 1,5116 | 0,0314 | 0,1180 | 0,7578 | 0,0099 |
| 20:4n-6 | 0,0026 | 0,0022 | 1,2307 | 0,1710 | 0,1055 | 0,7686 | 0,9406 |
| 17:00 | 0,0026 | 0,0020 | 1,2848 | 0,1606 | 0,0960 | 0,7792 | 0,0099 |
| 18:2n-6 | 0,0025 | 0,0023 | 1,0692 | 0,3907 | 0,4046 | 0,7893 | 0,6238 |
| 16:1n-5 | 0,0024 | 0,0011 | 2,2887 | 0,0745 | 0,1461 | 0,7993 | 0,0099 |
| 20:3:n-3 | 0,0023 | 0,0009 | 2,6454 | 0,0985 | 0,0281 | 0,8090 | 0,0099 |
| 20:1n-7 | 0,0023 | 0,0019 | 1,2242 | 0,1344 | 0,1341 | 0,8184 | 0,3366 |
| 22:4n-6 | 0,0021 | 0,0022 | 0,9340 | 0,0775 | 0,0184 | 0,8269 | 0,0297 |
| 16:2n-4 | 0,0020 | 0,0015 | 1,3428 | 0,0531 | 0,1123 | 0,8352 | 0,0099 |
| 20:2n-6 | 0,0019 | 0,0010 | 2,0433 | 0,1394 | 0,0818 | 0,8432 | 0,0099 |
| 17:1n-8 | 0,0019 | 0,0012 | 1,5735 | 0,1410 | 0,0864 | 0,8511 | 0,0099 |
| 18:2n-4 | 0,0019 | 0,0025 | 0,7701 | 0,0682 | 0,0990 | 0,8590 | 0,0099 |
| 16:3n-4 | 0,0019 | 0,0023 | 0,8326 | 0,0080 | 0,0635 | 0,8667 | 0,0099 |
| 18:1n-5 | 0,0019 | 0,0012 | 1,5263 | 0,1795 | 0,1497 | 0,8743 | 0,0792 |
| i:17:0 | 0,0018 | 0,0009 | 1,9487 | 0,1000 | 0,0459 | 0,8819 | 0,0099 |
| 24:1n-7 | 0,0018 | 0,0010 | 1,7980 | 0,0799 | 0,0327 | 0,8891 | 0,0099 |
| i:15:0 | 0,0017 | 0,0009 | 1,8335 | 0,0760 | 0,1228 | 0,8963 | 0,0495 |
| 16:1,n,10,,7me,,b, | 0,0017 | 0,0009 | 1,8187 | 0,0752 | 0,0255 | 0,9032 | 0,0099 |
| 20:00 | 0,0016 | 0,0014 | 1,1394 | 0,0666 | 0,0954 | 0,9099 | 0,0099 |
| 22:5n-6 | 0,0016 | 0,0015 | 1,1004 | 0,1009 | 0,0563 | 0,9166 | 0,1386 |
| 24:0 | 0,0016 | 0,0008 | 1,9770 | 0,0218 | 0,0673 | 0,9231 | 0,0099 |
| 24:6n-3 | 0,0014 | 0,0012 | 1,1192 | 0,0770 | 0,0480 | 0,9288 | 0,1386 |
| 21:5n-3 | 0,0013 | 0,0010 | 1,2985 | 0,1070 | 0,1148 | 0,9341 | 1,0000 |
| 16:1n-9 | 0,0011 | 0,0011 | 1,0493 | 0,1018 | 0,0910 | 0,9387 | 0,5545 |
| 22:4n-3 | 0,0011 | 0,0007 | 1,6689 | 0,0575 | 0,0258 | 0,9433 | 0,0099 |
| i:18:0 | 0,0011 | 0,0012 | 0,9383 | 0,0668 | 0,0623 | 0,9478 | 0,0891 |
| 16:4n-3 | 0,0010 | 0,0010 | 1,0329 | 0,0178 | 0,0383 | 0,9520 | 0,7921 |
| 16:1,n,10,,7me,,a, | 0,0010 | 0,0008 | 1,2906 | 0,0586 | 0,0332 | 0,9561 | 0,8317 |
| ai:15:0 | 0,0009 | 0,0009 | 1,0153 | 0,0253 | 0,0506 | 0,9600 | 0,0099 |
| 20:3n-6 | 0,0009 | 0,0007 | 1,2757 | 0,0536 | 0,0715 | 0,9637 | 0,0198 |
| 18:2n-7 | 0,0009 | 0,0005 | 1,8177 | 0,0446 | 0,0205 | 0,9673 | 0,0099 |
| 18:4n-1 | 0,0009 | 0,0008 | 1,1151 | 0,0515 | 0,0530 | 0,9708 | 0,7822 |
| 22:00 | 0,0009 | 0,0010 | 0,8159 | 0,0429 | 0,0193 | 0,9743 | 0,1980 |
| ai:17:0 | 0,0008 | 0,0004 | 1,9743 | 0,0395 | 0,0151 | 0,9778 | 0,0792 |
| Phytanic_acid | 0,0008 | 0,0012 | 0,6745 | 0,0369 | 0,0130 | 0,9812 | 1,0000 |
| 18:3n-4 | 0,0008 | 0,0005 | 1,6663 | 0,0334 | 0,0164 | 0,9843 | 0,0099 |
| i:16:0 | 0,0007 | 0,0008 | 0,8104 | 0,0284 | 0,0405 | 0,9872 | 0,6337 |
| 16:2n-7 | 0,0007 | 0,0005 | 1,2408 | 0,0073 | 0,0274 | 0,9899 | 0,0099 |
| 16:1n-11 | 0,0006 | 0,0004 | 1,4953 | 0,0337 | 0,0164 | 0,9925 | 0,0594 |
| 14:1n-5 | 0,0005 | 0,0004 | 1,5528 | 0,0163 | 0,0315 | 0,9947 | 0,9802 |
| 17:1n-7 | 0,0005 | 0,0008 | 0,6140 | 0,0173 | 0,0117 | 0,9967 | 0,0891 |
| Pristanic_acid | 0,0003 | 0,0004 | 0,8351 | 0,0109 | 0,0095 | 0,9979 | 1,0000 |
| 16:2n-6 | 0,0003 | 0,0002 | 1,1317 | 0,0107 | 0,0163 | 0,9990 | 0,0099 |
| 17:1n-10 | 0,0002 | 0,0002 | 1,2814 | 0,0141 | 0,0159 | 1,0000 | 0,1287 |

**S7. Comparing post-smolts grouped by cluster analysis**

The post-smolt are classified into three clusters; 14 % of the post smolts was in cluster 1, 43 % in cluster 2 and 43 % in cluster 3 (overlapping with adult salmon). There was a year effect of the clustering, as 95 % of the fish in cluster 1 were caught in 2016 or earlier, while only 26 % and 35 % of the cluster 2 and cluster 3 were caught early (≥2016) (Kruskal-Wallis, p<0.0001). The fish in cluster 1 were smaller (104±28g) than cluster 2 (129±39g) and cluster 3 (152±54g) (Kruskal-Wallis, p<0.007). Cluster 1 (1.8±0.2%) and Cluster 2 (1.8±0.2%) have lower lipid content than Cluster 3 (2.2±0.6%) (Kruskal-Wallis, p<0.001). The fish in cluster 1 had higher relative levels of 22:6n-3 (24±4%) than cluster 2 (17±4%) and cluster 3 (9±3%) (Kruskal-Wallis, p<0.0001) and low levels of 22:1n-11 (3±1%) compared with cluster 2 (6±2%) and cluster 3 (11±2%) (Kruskal-Wallis, p<0.0001).

S5.
